# Supplementary material for: Sulfuretin Prevents Obesity and Metabolic Diseases in Diet Induced Obese Mice
Source: PubMed Central journal article supplement — Biomol Ther (Seoul). 2018 Aug 22;27(1):107–16. doi: 10.4062/biomolther.2018.090 (PMC6319556; doi:10.4062/biomolther.2018.090), 2018-08-22
Supplement: bt-27-107_suppl.1.pdf [file bt-27-107_suppl.1.pdf]

**Table S1. Effects of sulfuretin in HFD-fed obese mice on serum lipid levels.**

Plasma concentrations of total cholesterol, triglycerides (TG), alanine aminotransferase (ALT), and aspartate transaminase (AST) in C57BL/6 mice fed with HFD were administered a daily dose of sulfuretin at 10 mg/kg. HFD (n = 5) or HFD+ sulfuretin (HFD + sulfuretin 10 mg/kg, n=5). Data represent means  $\pm$  s.e.m. Statistical significance was determined relative to a control by a Student's t-test (\* p<0.05).

**Table S2. Lists of sulfuretin-regulated genes.**

Genes identified from the microarray analysis that were induced 1.8-fold or greater by sulfuretin were selected. Highlighted genes are known Nrf2 target genes.

|                                  | <b>AST</b><br><b>(U/L)</b> | <b>ALT</b><br><b>(U/L)</b> | <b>TG</b><br><b>(mg/dl)</b> | <b>CHOL</b><br><b>(mg/dl)</b> | <b>LDL</b><br><b>(mg/dl)</b> | <b>HDL</b><br><b>(mg/dl)</b> | <b>Insulin</b><br><b>(ng/ml)</b> | <b>Glucose</b><br><b>(mg/dl)</b> |
|----------------------------------|----------------------------|----------------------------|-----------------------------|-------------------------------|------------------------------|------------------------------|----------------------------------|----------------------------------|
| <b>HFD</b>                       | 289 ± 66 <sup>#</sup>      | 10 ± 1.8 <sup>#</sup>      | 114 ± 6.5 <sup>*</sup>      | 151 ± 20 <sup>*</sup>         | 19 ± 3.6                     | 57 ± 4.3                     | 7.76 ± 1.8                       | 241.57 <sup>*</sup><br>± 58.1    |
| <b>HFD+</b><br><b>Sulfuretin</b> | 147 ± 11                   | 6 ± 0.8                    | 87 ± 5.8                    | 93 ± 7                        | 15 ± 0.8                     | 51 ± 5.1                     | 7.64 ± 0.3                       | 200.7<br>± 22.4                  |

**Table S1. Effects of sulfuretin in HFD-fed obese mice on serum lipid levels.**

Plasma concentrations of total cholesterol, triglycerides (TG), alanine aminotransferase (ALT), and aspartate transaminase (AST) in C57BL/6 mice fed with HFD were administered a daily dose of sulfuretin at 10 mg/kg. HFD (n = 5) or HFD+ sulfuretin (HFD + sulfuretin 10 mg/kg, n=5). Data represent means  $\pm$  s.e.m. Statistical significance was determined relative to a control by a Student's t-test (\* p<0.05).

**Table S2. Lists of sulfuretin-regulated genes.**

Genes identified from the microarray analysis that were induced 1.8-fold or greater by sulfuretin were selected. Highlighted genes are known Nrf2 target genes.

| No.       | Gene Symbol    | Fold change | No.       | Gene Symbol    | Fold change | No.       | Gene Symbol    | Fold change |
|-----------|----------------|-------------|-----------|----------------|-------------|-----------|----------------|-------------|
| <b>1</b>  | <b>Hmox1</b>   | <b>13.8</b> | 24        | Smyd4          | 2.2         | <b>47</b> | <b>Jun</b>     | <b>1.9</b>  |
| <b>2</b>  | <b>Srxn1</b>   | <b>6.8</b>  | <b>25</b> | <b>Cxcl1</b>   | <b>2.2</b>  | <b>48</b> | <b>Ero1l</b>   | <b>1.9</b>  |
| 3         | Slc40a1        | 6.7         | <b>26</b> | <b>Mafg</b>    | <b>2.2</b>  | 49        | Zfp655         | 1.9         |
| <b>4</b>  | <b>Gclm</b>    | <b>5.3</b>  | <b>27</b> | <b>Slc3a2</b>  | <b>2.1</b>  | 50        | Net1           | 1.9         |
| <b>5</b>  | <b>Ak4</b>     | <b>4.3</b>  | 28        | BC022687       | 2.1         | 51        | Tmem55a        | 1.9         |
| <b>6</b>  | <b>Gclc</b>    | <b>4.2</b>  | 29        | Pvr            | 2.1         | 52        | Ccdc117        | 1.9         |
| <b>7</b>  | <b>Osgin1</b>  | <b>3.9</b>  | <b>30</b> | <b>Pgd</b>     | <b>2.1</b>  | 53        | Zcchc2         | 1.9         |
| <b>8</b>  | <b>Slc2a1</b>  | <b>3.5</b>  | <b>31</b> | <b>Bach1</b>   | <b>2.1</b>  | 54        | Cpeb4          | 1.9         |
| 9         | Cxcl5          | 3.2         | 32        | 1810013L24Rik  | 2.1         | 55        | Kitl           | 1.9         |
| <b>10</b> | <b>Txnrd1</b>  | <b>2.7</b>  | <b>33</b> | <b>Clcn3</b>   | <b>2.1</b>  | 56        | Ints12         | 1.9         |
| 11        | Slc4a4         | 2.7         | 34        | Hk2            | 2.1         | 57        | Ube2o          | 1.9         |
| <b>12</b> | <b>Maff</b>    | <b>2.6</b>  | <b>35</b> | <b>Abcc4</b>   | <b>2.0</b>  | <b>58</b> | <b>Aox1</b>    | <b>1.9</b>  |
| <b>13</b> | <b>Slc48a1</b> | <b>2.6</b>  | 36        | Dusp10         | 2.0         | <b>59</b> | <b>Hsf2</b>    | <b>1.9</b>  |
| <b>14</b> | <b>Cbr3</b>    | <b>2.5</b>  | <b>37</b> | <b>Mat2a</b>   | <b>2.0</b>  | 60        | Gja1           | 1.8         |
| <b>15</b> | <b>Lcor</b>    | <b>2.5</b>  | <b>38</b> | <b>Abcc1</b>   | <b>2.0</b>  | 61        | Rora           | 1.8         |
| <b>16</b> | <b>Nqo1</b>    | <b>2.5</b>  | <b>39</b> | <b>Mllt11</b>  | <b>2.0</b>  | 62        | Mat2a          | 1.8         |
| 17        | A130040M12Rik  | 2.4         | <b>40</b> | <b>Adh7</b>    | <b>2.0</b>  | <b>63</b> | <b>Tmem140</b> | <b>1.8</b>  |
| <b>18</b> | <b>Ly96</b>    | <b>2.4</b>  | <b>41</b> | <b>Dnajb4</b>  | <b>2.0</b>  | 64        | Clcf1          | 1.8         |
| 19        | Ero1l          | 2.4         | <b>42</b> | <b>Gpr137b</b> | <b>2.0</b>  | 65        | Atf3           | 1.8         |
| <b>20</b> | <b>Sqstm1</b>  | <b>2.3</b>  | 43        | Irgm2          | 2.0         | 66        | Preb           | 1.8         |
| 21        | 1810013L24Rik  | 2.3         | <b>44</b> | <b>Sgms1</b>   | <b>1.9</b>  | <b>67</b> | <b>Gsr</b>     | <b>1.8</b>  |
| 22        | Sgms2          | 2.3         | 45        | Gm3776         | 1.9         |           |                |             |
| <b>23</b> | <b>Tshz1</b>   | <b>2.2</b>  | 46        | Zfp770         | 1.9         |           |                |             |
